# Supplementary material for: Intrathymic injection of hematopoietic progenitor cells establishes functional T cell development in a mouse model of severe combined immunodeficiency
Source: PubMed Central journal article supplement (PMC5432974; doi:10.1186/s13045-017-0478-z), 2017-05-16
Supplement: 13045_2017_478_MOESM1_ESM.pdf [file 13045_2017_478_MOESM1_ESM.pdf]

**Intrathymically injected NSG mice survive A20 lymphoma challenge.**

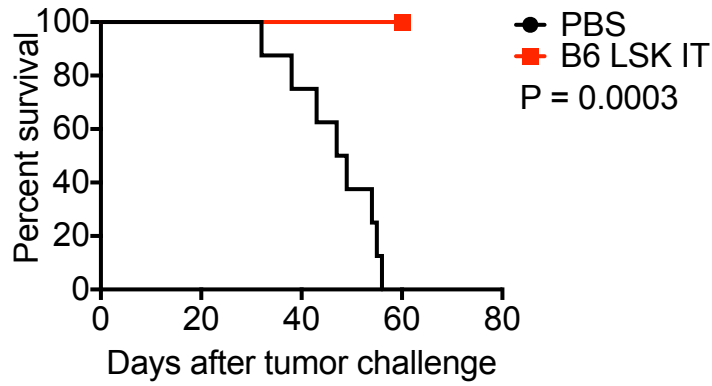

NSG mice were intrathymically injected with 10,000 C57BL/6 LSK cells or PBS. Five weeks after intrathymic injection A20-TGL mouse lymphoma cells were injected intravenously into all mice. Survival curve is presented; P value was determined by Log-rank test (n=7-8).
